# Supplementary material for: Mesoporous silicas functionalized with a high density of carboxylate groups as efficient absorbents for the removal of basic dyestuffs
Source: Royal Society of Chemistry journal article supplement (doi:10.1039/b600611f), 2006-01-01
Supplement: b600611f.pdf [file b600611f.pdf]

### Electronic Supplementary Information (ESI)

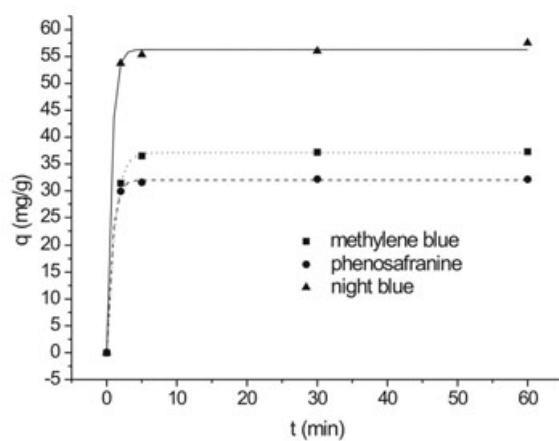

**Fig. 1S** Kinetics of the adsorption of three basic dyes onto C-MS-L. Experimental conditions: temperature 25 °C, pH=10, concentration: 1mM.

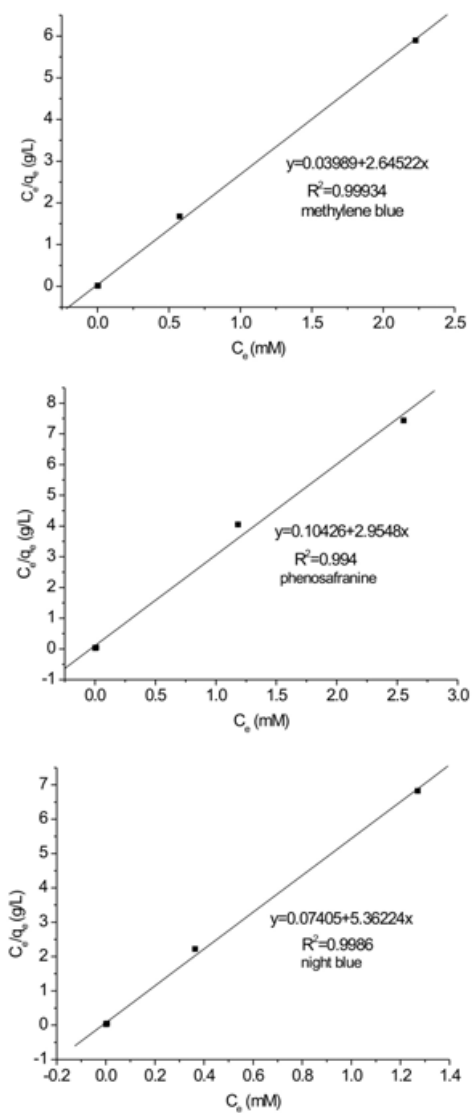

**Fig.2S** Langmuir isotherm linear plots for the adsorption of methylene blue, phenosafranine and night blue onto C-MS-L at pH=10.

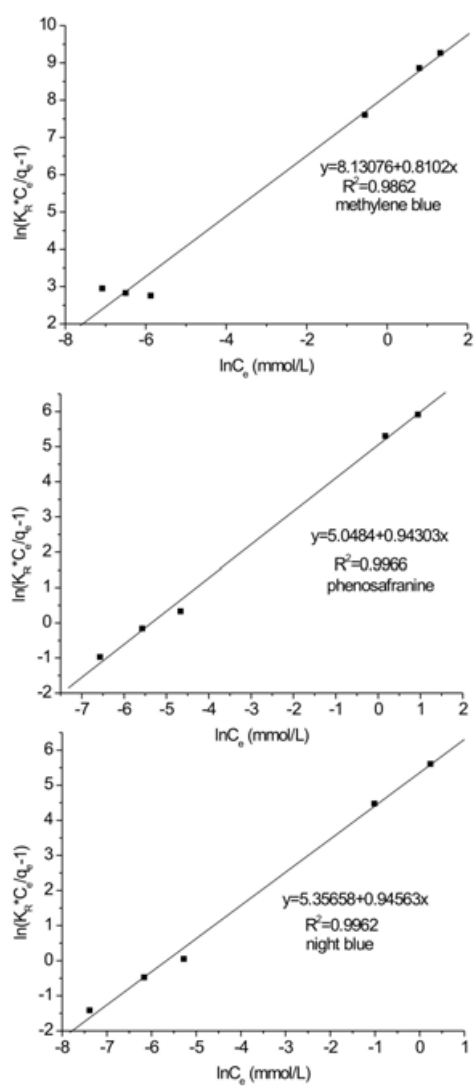

**Fig. 3S** Redlich-Peterson isotherm linear plots for the adsorption of methylene blue, phenosafranine and night blue onto C-MS-L at pH=10.

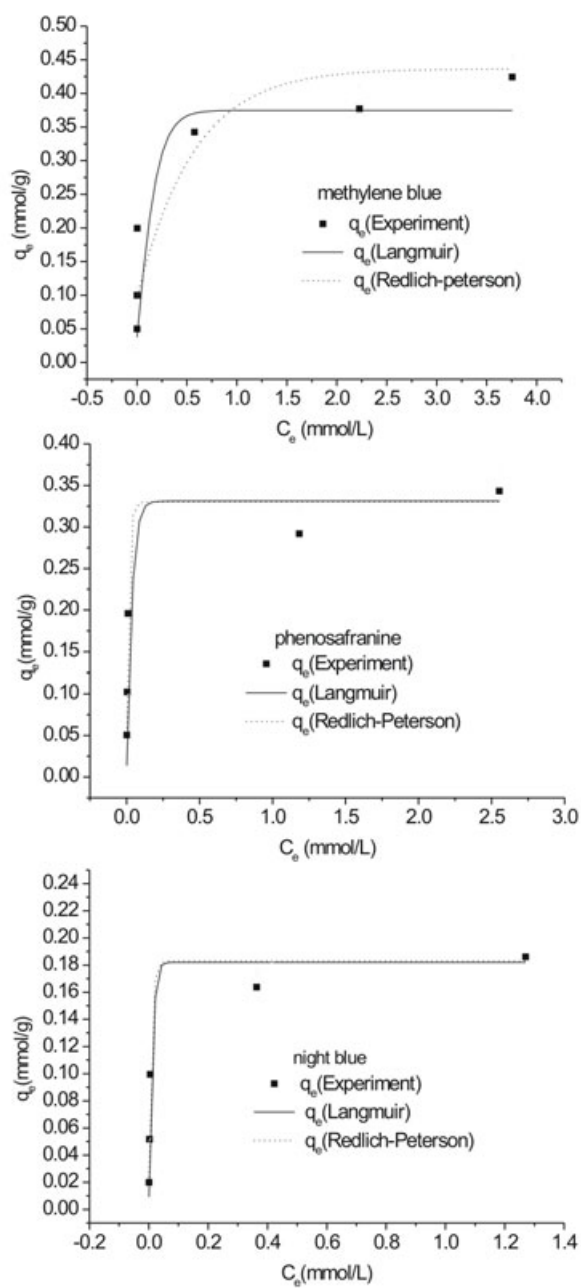

Fig. 4S Different isotherm equation plots for the adsorption of methylene blue, phenosafranine and night blue onto C-MS-L.
